# Supplementary material
Source: publisher figshare collection journal article supplement (https://gsajournals.figshare.com/ndownloader/files/17615405)
Supplement: Supplementary file 1 [file 17615405]

>elegansMED1
CSNCSVTETIRWRNIRSKEGIQCNACFIYQRKYNKTRPVTAVNKY
>tribulationisMED1
CTNCSATESCKWRNVKSEEEVVCNACFVYRRKYKRVRPLGVAEKY
>remaneiMED1.1
CSNCFATETCQWRNVRSENGVLCNACFIYQRKYKKTRPVTAMEKY
>nigoniMED1.1
CSNCSITKSCQWRNVKSKEHILCNACFTYQRKYKKNRPMKAIQDY
>briggsaeMED1.1
CSNCSIINSCRWRNVKSKESTLCNACFVYRRYIKKDRPTSAIESY
>zanzibariMED1.1
CSHCHVSESCRWMNVKSRDAILCNACFIYRRKYKVNRPIDVAVRY
>sinicaMED1.1
CSNCYVSETCRWMNVKSEEGMLCNACFTYRRKYKRDRPLDVAMKY
>latensMED1.1
CSNCFATETCQWRNVRLENGIQCNACFIYQRKYKKTRPVTAMEKY
>inopinataMED1.1
CSNCAVTESRPWRNVRSKDGPLCNACFIYKRKYNKTRPASAVHNY
>brenneriMED1.1
CSNCGSDESCKWRNITSRDGILCNACFIYRRKYKKNRPTVVAEAY
>doughertyiMED1.1
CSHCSATETCQWRNIRSKDGILCNACFIYKRKYKELRPVDAIQKY
>tropicalisMED1.1
CTVCSITETCKWRNVRSNDGILCNACFIYQRKYDSTRPDKAQNNY
>japonicaMED1.1
CTNCQTTKTCRWRNVTTRVLCNACFVYTRKYHKPRPSTAVIAY
>kamaainaMED1.1
CRSCAATSTCQWRSLRSKEGPLCNACFIYQRKYKKSRPTKAVEHY
>nouraguensisMED1.1
CTNCQVTETVRWRNIKTNVVCNACFVYERKYKKCRPTTAIKKM
>beceiMED1.1
CTNCQVTETVRWRNIRTNVLCNPCFVYKRKYKKCRPTTAIQKM
>panamensisMED1.1
CTNCMATETCKWRNVKKQNVMCNACFVYERKYKKSRPEGTTN
>waitukubuliMED1.1
CTNCMATETAKWRNVRKVNVLCNACFVYERKYKRCRPLGTTN
>afraMED1.1
CSHCKATETCKWRDVKTHVKCNACFIYERKYGKSRPTGAIDAF
>sulstoniMED1.1
CSVCKVTESCRWRNLRSDVKCNACFIYERKYEKTRPDAAIKAF
>nigoniMED1.10
CSNCSITNSCQWRNIKSKESVLCNACYVYRRYIKKDRPTSAIENY
>latensMED1.10
CSNCFVTETCQWRNVRSENGIECNACFIYQRKYKKTRPVSAMEKY
>brenneriMED1.10
CGNCGTTETYRWRSVTSKESIRCFTCYEYRRTTKKERPAAVIKAN
>doughertyiMED1.10
CSHCAATETCQWRNVRSKDSILCNACFVYQRKYKNPRPLEAIQSY
>brenneriMED1.11
CGNCGTTESCFWKNVNSKDNIRCNTCFRYRQRNKKERSADVIQAS
>latensMED1.12
CSHCKATESCCWRKVRSDTGMMCNACFIYERKYKKSRPLSAIKSY
>brenneriMED1.12
CSNCGTTESCKWKNVKSKDNIRCNTCFIYRRRNNKDRPAAAIK
>latensMED1.13
CSHCKATESCCWRKVRSDTGMMCNACFIYERKYKKSRPLSAIKSY
>brenneriMED1.13
CSNCGTTESCKWKNVRSKDNIQCNTCFIYRQRNNKDRPAAAIK
>brenneriMED1.14
CSNCGTTESCKWKNVKSKDNIQCNTCFIYRRRNNKDRPAAAIK
>doughertyiMED1.14
CSHCGATETCQWRNVRSKDSILCNACFVYQRKYKNARPLEAIQNY
>brenneriMED1.15
CGNCGTTESCKWRNVRSKDNIRCNTCYDYRRRTKKERSADVIQNY
>brenneriMED1.16
CGNCGTTESCKWRNVTSKINIRCNTCFTYRQRNNKDRPAAAIQYN
>doughertyiMED1.16
CSHCAATETCQWRNVRSKDSILCNACFVYQRKYKNPRPLEAIQNY
>doughertyiMED1.17
CSHCSAMETCQWRNARSKDTILCNACFTYQRKYKKCRPLTVVQKF
>brenneriMED1.18
CSNCGSDESCEWRNITSKDGILCNACFIYRRKYKKNRSTVVAETY
>doughertyiMED1.18
CSHCAATETCQWRNVLSKDSILCNACFVYQRKYKNARPIEAIQNY
>remaneiMED1.2
CSNCFATETCQWRNVRSENGILCNACFIYQRKYKKTRPVTAMEKY
>nigoniMED1.2
CSNCSITKSCQWRNVKSKEHILCNACFTYQRKYKKNRPMKAIQDY
>briggsaeMED1.2
CSNCFITESCQWRNVTSREGMLCNACFTYRRKYKKNRPTAAIEKY
>zanzibariMED1.2
CSHCHVSESCRWMNVKSRDGILCNACFTYRRKYKVNRPIDVAVRY
>sinicaMED1.2
CSNCYVSETCRWMNVKSEEGMLCNACFTYRRKYKRDRPLDVALKY
>latensMED1.2
CSNCFATETCQWRNVRSESGILCNACFIYQRKYKKTRPVTAVEKY
>inopinataMED1.2
CSNCAVTESRPWRNVRSKDGPLCNACFIYKRKYNRTRPASAVHNY
>brenneriMED1.2
CSNCGSDESCKWRNITSRDGILCNACFIYRRKYKKTRPTVVAEAY
>doughertyiMED1.2
CSHCSATETCQWRNIRSKDGILCNACFTYKRKYKELRPVDAIQKY
>tropicalisMED1.2
CTVCSITETCKWRNVRSNDGILCNACFIYQRKYDSTRPDKAQNNY
>japonicaMED1.2
CTNCQTTKTCRWRNVTTRVLCNACFVYTRKYNKPRPSTAVIAY
>kamaainaMED1.2
CRSCAATSTCQWRSLRSKEGPLCNACFIYQRKYKKSRPTKAVEHY
>nouraguensisMED1.2
CTNCQVTETVRWRNITTNVVCNACFVYERKYKKCRPTTAIKKM
>beceiMED1.2
CTNCQVTETIRWRNIRTNVLCNPCFVYERKYKKCRPTTAIQKM
>waitukubuliMED1.2
CTNCMATETAKWRNVRKVNVLCNACFVYERKYKRCRPLGTTN
>afraMED1.2
CSHCKATETCKWRDVKTQVKCNACFIYQRKYGKSRPTGAIELF
>sulstoniMED1.2
CFHCNATESCRWRDIKKDVKCNACFIYERKYKTSRPIGAIRTF
>brenneriMED1.20
CSNCFTTSSCRWKNVRSKSNILCNTCFIYKQRNGEDRPAKAIIAH
>doughertyiMED1.20
CSHCSTTETCRWRNIRSKNEILCNACVREGKLEGNGASNGSY
>brenneriMED1.21
CSNCFTTSSCRWKNVISKSNILCNTCFIYKQRNGEDRPAKAIIAH
>doughertyiMED1.21
CSHCSTMETCRWRNIRSKNGILCNACYTYERESWKAMVRPVEVIEKH
>brenneriMED1.22
CSNCFTTNSCKWKNVKSKSNILCNTCFIYKRRNGEDRPAKAIIAH
>doughertyiMED1.22
CSHCSTTETCRWRNIRSKNGILCNACYAYERESWKAMVRPVEVIEKY
>brenneriMED1.23
CSNCFTTNSCKWKDVKSKSNILCNTCFIYKRRNGEDRPAKAITAH
>doughertyiMED1.23
CSHCAATETCQWRRARSKESILCNACFVYQRKYKISRPLTVVQTY
>brenneriMED1.24
CTNCQTTDASEWKRAISKDNILCKTCFDYRRTHKENRPTMKTH
>doughertyiMED1.24
CSHCFATETCQWRNSRSKDTILCNAWFTYQRKYKKCRPFTVVQKF
>brenneriMED1.25
CTNCQTTDASEWKSAVSKDNILCKTCFDYRRTHKENRPTLKTH
>doughertyiMED1.25
CSHCSTTETCRWKNIRSKDGILCNACYAYKRESWKAMVRPVEVIEKY
>brenneriMED1.26
CSNCQTTGSSNWRNVNSKDNIMCHKCFIYRKVNKKDRPTSKPVMKEVK
>brenneriMED1.27
CSNCNTTDASEWKNAVSKDNILCKTCFEYRRAHKENRPILKTVVM
>doughertyiMED1.27
CSHCSTTETCQWRNVRSKNGVLCNACDVYKRQSLRALVRPVEIIEKY
>remaneiMED1.3
CSNCFATETCQWRNVRSENGILCNACFIYLRKYKKTRPVTAVEKY
>nigoniMED1.3
CSNCFVTKSCRWNNITSKDGILCTACYTYRRKYKKNRPTKAMERY
>briggsaeMED1.3
CSNCFITESCQWRNVTSREGMLCNACFTYRRKYKKNRPTAAIEKY
>latensMED1.3
CSNCFAAETCQWRNVRSENGIQCNACFIYQRKYKKTRPVTAMEKY
>brenneriMED1.3
CSNCGSDESCKWRNITSRDGILCNACFIYRRKYKKNRPTVVAEAY
>doughertyiMED1.3
CSHCSSTETCQWRNIRSKDGILCNACFTYKRKYKELRPVDAIQKY
>tropicalisMED1.3
CTVCSITETCKWRNVRSNDGILCNACFIYQRKYDSTRPDKAQNNY
>japonicaMED1.3
CSNCQTTKTCRWRNVTTRVLCNACFVYTRKYNKPRPSTAVIAY
>nouraguensisMED1.3
CSNCASTKTCQWRNVTKSNVLCNACFVYQNRHKKTRPFQSIRKK
>beceiMED1.3
CTNCQATETVQWRNIRTNVLCNPCLVYKRKYKKCRPTTAIQKM
>afraMED1.3
CSLCKATETCKWRDVKTQVKCNACFIYQRKYGKNRPTGAIEAF
>remaneiMED1.4
CSNCFATETCQWRNVRSENGILCNACFIYQRKYKKTRPATAMEKY
>nigoniMED1.4
CTNCFVTKSCRWRNITSSERTLCTACFTYRRKYKKNRPTKVIERY
>briggsaeMED1.4
CTNCFVTKTCQWRNITSSGGILCTACFTYRRKYKKNRPTKAIERY
>latensMED1.4
CSNCFATETCQWRNVRSENGILCNACFIYQRKYKKTRPVTAVEKY
>brenneriMED1.4
CSNCGSDESCKWRNITSRDGILCNACFIYRRKYKKNRPTVVAEAY
>doughertyiMED1.4
CSHCSATETCQWRNARSKDTIMCNACFTYQRKYKKCRPLTVVQKF
>tropicalisMED1.4
CSVCSTTKTCRWRKNQSKMECNACYIYRQKYKKNRPSY
>beceiMED1.4
CTNCATTETCRWRNISKPNVLCNSCFVYKNKYKKTRPFQTLR
>afraMED1.4
CSLCKATETCKWRDVKTQVKCNACFIYQRKYGKSRPTGAIEAF
>remaneiMED1.5
CSNCFSTETCQWRNVRSENGILCNPCFIYQRKYKKTRPVTAMEKY
>briggsaeMED1.5
CTNCFVTKTSLWRNVTSSEGILCTACFTYKRKYKKNRPTKAIERY
>latensMED1.5
CSNCFATETCQWRNVRSENGILCNACFIYLRKYKKTRPVTAVEKY
>brenneriMED1.5
CSHCGVQQSCKWRNILSPQILCNACYIYQRKYNKVRPATAAASY
>doughertyiMED1.5
CSHCSATENCQWRNARSKDTILCNACFTYQRKYKKCRPITVVRKF
>afraMED1.5
CSLCKATETCKWRDVKTQVKCNACFIYQRKYGKNRPTGAIEAF
>remaneiMED1.6
CSNCFATETCQWRNVRSENGILCNACFIYRRKYKKTRPVSAMEKY
>latensMED1.6
CSNCFATETCQWRNVRSENGILCNACFIYQRKYKKTRPATAMEKY
>brenneriMED1.6
CSRCGSTETCKWRQCRSPNILCNACFIYHRKFNKDRPESASVAY
>doughertyiMED1.6
CSHCSATETCQWRNARSKDTILCNACFTYQRKYKKCRPLTVVQKF
>tropicalisMED1.6
CTVCSITETCKWRNVRSNDGILCNACFIYQRKYDSTRPDKAQNNY
>remaneiMED1.7
CSHCKVTESCCWRKVRSDTGMMCNACFIYERKYKKSRPLSAIKKH
>nigoniMED1.7
CSNCFITESCQWRNVTSREGMLCNACFTYRRKYKKDRPTAAIEKY
>latensMED1.7
CSNCFATETCQWRNVRSANGIQCNACFIYQRKYKKTRPVTAMEKY
>brenneriMED1.7
CGNCGTTESCIWRNVKSKESIRCHKCYGYRQRTKKERPAAVIKAN
>doughertyiMED1.7
CSHCGATETCQWRNVRSKDSILCNACFVYQRKYKNARPIDAIQNY
>remaneiMED1.8
CSHCEINQSCCWRKVRSETGMMCNACFVYERKYKKSRPLSAIKKH
>nigoniMED1.8
CSNCFITESCQWRNVTSREGMLCNACFTYRRKYKKDRPTAAIEKY
>brenneriMED1.8
CSRCGSTETCKWRQCRSPNILCNACFIYHRKFNKDRPESASVAY
>remaneiMED1.9
CSNCFATETCQWKNVRSENGILCNACFIYQRKYKKTRPVTAMEKY
>nigoniMED1.9
CSNCSITNSCQWRNIKSKEAVLCNACYVYRRYIKKDRPTSAIESY
>brenneriMED1.9
CGNCGTTKPCQWNNVKSKDNIRCHTCYCYRLRTKMERPASLIKTN
>doughertyiMED1.9
CSHCSATETCQWRNARSKDTILCNACFTYQRKYKKCRPLTVVQKF
>elegansMED2
CSNCSVTETIRWRNIRSKEGIQCNACFIYQRKYNETRPVTAVNKY
